# Supplementary material for: Melanin Concentration Gradients in Modern and Fossil Feathers
Source: PubMed Central journal article supplement (PMC3608712; doi:10.1371/journal.pone.0059451), 2013-03-26

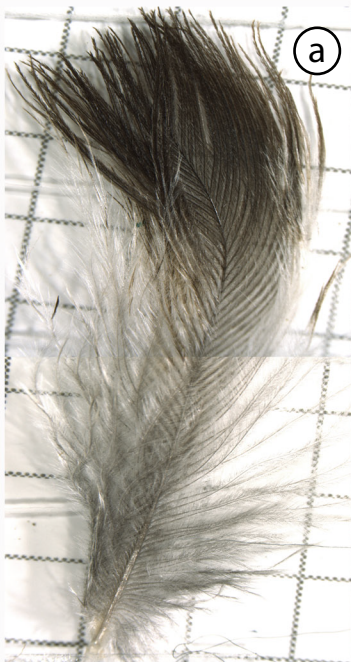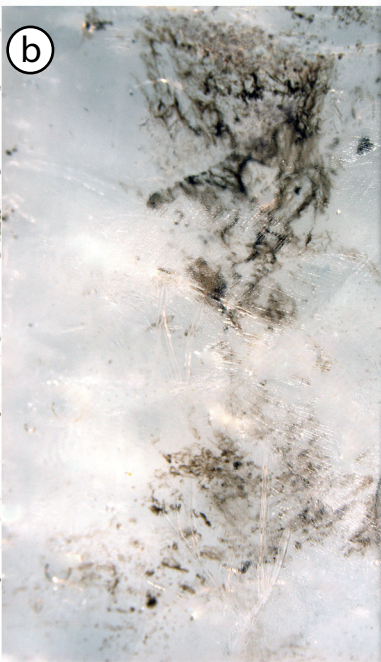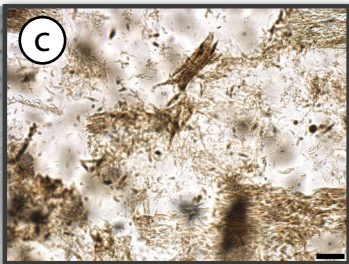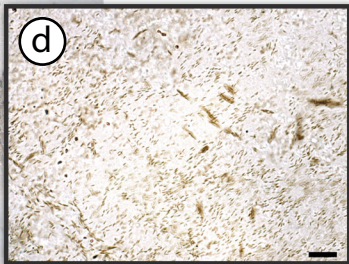

Supplement: pone.0059451.s002.pdf [file pone.0059451.s002.pdf]
